# Supplementary material
Source: publisher figshare collection journal article supplement (https://tandf.figshare.com/ndownloader/files/24424743)
Supplement: Supplementary file 1 [file 24424743]

% Mathlab- code for the Tenti-S6 model. With this code, a spontaneous RB-scattering

%spectrum can be generated. Here, Air is taken as an example. If choosing other molecules,

% the corresponding parameters should be changed. And an Unknown parameters can be set

%as a variables for fitting.

clc; clear all; close all;

%--------------Air as an example-----------------------------------

gas = 'Air';% selecting gas style

M = 28.964; % molar mass, unit: g/mol

p = 1.000 * 10^5; % pressure, unit pa

T = 20 + 273.15; %temperature, unit K

eta_0 = 1.716e-5;% unit Pa·s

eta_s = eta_0*(T/273)^1.5*(273+194)/(T+194);% shear viscosity, unit Pa·s

bulk_vis = 1.48 * 10^(-5);% bulk viscosity, unit Pa∙s

thermal_cond_0 = 0.0241;% unit W/(m*K)

thermal_cond = thermal_cond_0*(T/273)^1.5*(273+111)/(T+111); % thermal conductivity, unit W/(m*K)

lambda = 532.22e-9; % The wavelength of the laser, unit m

kb = 1.380649e-23; % Boltzmann constant, unit J/K

R = 8.314462618;% gas constant, unit J/(mol·K)

m_m = M*1.66053906660e-27; % Molecular weight, kg

v0 = sqrt(2*kb*T/m_m); % thermal speed，m/sec

n0 = p/(T*kb); % Numerical density, in 1/m^3

%-------------------scattering angle---------------------------------

scattering_angle = 55.7; % scattering angle

angle = scattering_angle/2*(pi/180); % scattering angle in radians

q = sin(angle)*4*pi/lambda; % wave number, in m^-1

y = n0*kb*T/(q*v0*eta_s); % Uniformity parameter dimensionless

%--------------------------------------------------------------------

n_xi = 2001; % Number of frequency points, dimensionless unit

xi_lef = -2.6; % Minimum frequency point, dimensionless unit

xi_rgt = 2.6; % Maximum frequency point, dimensionless unit

dxi = (xi_rgt-xi_lef)./(2.0.*(n_xi-floor(n_xi./2)-1));

for i = 1:n_xi

xi(i) = xi_lef+dxi.*(i-1); % Calculate the frequency points,

% x-scale dimensionless unit

end

c_tr = 3/2; % Translational heat capacity

c_int = 1; % internal heat capacity, linear molecule c_int = 1, nonlinear molecule c_int = 1.5

gamma_int = c_int/(c_tr+c_int); % Internal heat capacity ratio,

y6 = y;

rlx_int = 1.5*bulk_vis/(eta_s*gamma_int); % Internal relaxation

eukenf = m_m*thermal_cond/(eta_s*kb*(c_tr+c_int)); % Euken factor

v1 = xi'.*q.*v0./(2.*pi)./1e9;% The relative frequency, in GHz

%-----------------------------------------------------------------

%% The spectrum calculation from WCU equation

cpxunit = 1i; % Unit imaginary part of complex number

one = 1; % One

zero = 0; % Zero

% Calculate j

j020 = -y;

j100 = -gamma_int*y/rlx_int;

j001 = j100*c_tr/c_int;

j100001 = j100*sqrt(c_tr/c_int);

j110 = j100*5/6+j020*2/3;

j011110 = j100*sqrt(5/(8*c_int));

j_nu = 0.4*(1.5+c_int)+(3+c_int)/(2*rlx_int)+9*eukenf/(16*rlx_int^2);

j_de = -1+(4/15)*eukenf*(1.5+c_int)+(c_int/3)*eukenf/rlx_int;

j_co = -y*(2*gamma_int/3);

j011 = j_co*j_nu/j_de;

% Initialization for the area of spontaneous RBS spectrum

% Coherent RBS spectrum

sptarea = 0; % Area of spontaneous RBS spectrum

coharea = 0; % Area of coherent RBS spectrum

% calculate the matrix equation Ax = B. The x here is the target variable.

for i = 1:n_xi

% Calculate w

z = xi(i)+cpxunit.*y6;

F = @(x)exp(-x.^2)./(z-x);

w0 = integral(F,-inf,inf);

w1 = -sqrt(pi)+z.*w0;

w2 = z.*w1;

w3 = -0.5.*sqrt(pi)+z.*w2;

w4 = z.*w3;

w5 = -3.*sqrt(pi)./4+z.*w4;

w6 = z.*w5;

% Calculate i

i0000 = w0./(sqrt(pi));

i0100 = (z.*w0-sqrt(pi)).*sqrt(2./pi);

i0001 = i0100;

i0010 = (2.*w2-w0)./(sqrt(6.*pi));

i1000 = i0010;

i0011 = (2.*w3-3.*w1)./(sqrt(5.*pi));

i1100 = i0011;

i0101 = 2.*w2./sqrt(pi);

i0110 = (-w1+2*w3)./sqrt(3.*pi);

i1001 = i0110;

i0111 = (-3.*w2+2.*w4).*sqrt(2./(5.*pi));

i1101 = i0111;

i1111 = (13.*w2-12.*w4+4.*w6)./(5.*sqrt(pi));

i0002 = (-w0+2.*w2)./sqrt(3.*pi);

i0200 = i0002;

i0211 = (-w1+8.*w3-4.*w5)/sqrt(15.*pi);

i1102 = i0211;

i0202 = 2.*(w0-2.*w2+2.*w4)./(3.*sqrt(pi));

i0210 = (w0+4.*w2-4.*w4)./(3.*sqrt(2.*pi));

i1002 = i0210;

i0102 = (-w1+2.*w3).*sqrt(2./(3.*pi));

i0201 = i0102;

i1010 = (5.*w0-4.*w2+4.*w4)./(6.*sqrt(pi));

i1110 = (7.*w1-8.*w3+4.*w5)./sqrt(30.*pi);

i1011 = i1110;

% Calculate matrix A

a_factor = one;

A(1,1) = -j020.*i0000+cpxunit;

A(2,1) = -j020.*i0001;

A(3,1) = -j020.*i0011;

A(4,1) = -j020.*i0010;

A(5,1) = zero;

A(6,1) = zero;

A(1,2) = -j020.*i0100;

A(2,2) = -j020.*i0101+cpxunit;

A(3,2) = -j020.*i0111;

A(4,2) = -j020.*i0110;

A(5,2) = zero;

A(6,2) = zero;

A(1,3) = (j020-j110).*i1100;

A(2,3) = (j020-j110).*i1101;

A(3,3) = (j020-j110).*i1111-cpxunit;

A(4,3) = (j020-j110).*i1110;

A(5,3) = -j011110.*i0100;

A(6,3) = -j011110.*i0101;

A(1,4) = (j020-j100).*i1000;

A(2,4) = (j020-j100).*i1001;

A(3,4) = (j020-j100).*i1011;

A(4,4) = (j020-j100).*i1010-cpxunit;

A(5,4) = -j100001.*i0000;

A(6,4) = -j100001.*i0001;

A(1,5) = j100001.*i1000;

A(2,5) = j100001.*i1001;

A(3,5) = j100001.*i1011;

A(4,5) = j100001.*i1010;

A(5,5) = (j001-j020).*i0000+cpxunit;

A(6,5) = (j001-j020).*i0001;

A(1,6) = j011110.*i1100;

A(2,6) = j011110.*i1101;

A(3,6) = j011110.*i1111;

A(4,6) = j011110.*i1110;

A(5,6) = (j011-j020).*i0100;

A(6,6) = (j011-j020).*i0101+cpxunit;

% calculate matrix B

% For coherent RBS

B(1,1) = -i0100;

B(2,1) = -i0101;

B(3,1) = -i0111;

B(4,1) = -i0110;

B(5,1) = zero;

B(6,1) = zero;

% For spontaneous RBS

B(1,2) = -i0000;

B(2,2) = -i0001;

B(3,2) = -i0011;

B(4,2) = -i0010;

B(5,2) = zero;

B(6,2) = zero;

% solve the equation for X

X=A\B;

% cohsig(i) = X(1,1).*conj(X(1,1));

sptsig(i) = 2.*real(X(1,2));

end

% area normalization

TentiSpectrum = sptsig./polyarea([min(v1) v1' max(v1)],[0 sptsig 0]);

FSR = 2.9929;% the value of FSR, unit GHz

FWHM = 0.058;% the linewidth of the instrument function, unit GHz

Airy = 1./(1+(2.*FSR./(pi.*FWHM)).^2.*sin(pi./FSR.*v1).^2); % Calculate the instrument function

% convolve with instrument function

TentiSpectrum_conv = conv(Airy,TentiSpectrum,'same');

% area normalization

TentiSpectrum_conv = TentiSpectrum_conv./polyarea([min(v1) v1' max(v1)],[0 ...

TentiSpectrum_conv' 0]); %

% plot figure;

figure;

plot(v1,TentiSpectrum_conv)
